# Supplementary material for: Identification and functional characterisation of a locus for target site integration in Fusarium graminearum
Source: Springer Nature journal article supplement (doi:10.1186/s40694-024-00171-8), 2024-02-26
Supplement: MOESM2 [file 40694_2024_171_MOESM2_ESM.pdf]

**Table S1.** List of primers used in this work

| Primer                        | 5'-3' sequence                              | Fragment amplified                                     |
|-------------------------------|---------------------------------------------|--------------------------------------------------------|
| Dest_F SapI                   | TATGCTCTTCATCAGGAGATCTCATGTGAG              | Spec-Ori from pGreen                                   |
| Dest_R SapI                   | TATGCTCTTCATGTTTAATCCGGGGATCG               |                                                        |
| FgRB_R SapI (P4) <sup>2</sup> | TATGCTCTTCATGACCAGAACCACCAATAACTG           | RB from PH-1                                           |
| FgRB_F XhoI                   | TATCTCGAGGGTCTCTACTAAGACCCAAGGACAGGTTGC     |                                                        |
| pGPDApro_F                    | ATATGGTCTCAACCTCCTCACTCCACCATGTTGG          | <i>gpda</i> promoter                                   |
| pGPDApro_R                    | ATATGGTCTCATGTTTTTGAAGATTGGGTTCTCTC         |                                                        |
| TtrpC_F                       | ATATGGTCTCACTGCCACTTAACGTTACTGAAATC         | <i>trpC</i> terminator                                 |
| TtrpC_R                       | ATATGGTCTCATAGTGGTACCAGTTCAAGGAAGAAACAGTGC  |                                                        |
| Gene_F1 (P7) <sup>2</sup>     | ATATGGTCTCAGGCTGTATGATCGAGCAGGACGGACTCC     | <i>Geneticin</i> gene                                  |
| Gene_R1 (P8) <sup>2</sup>     | ATATGGTCTCACTGATCAGAAGAATTCGTCCAACAGG       |                                                        |
| Gene_R XhoI                   | TATCTCGAGGGTCTCAAGGTCCTCACTCCACCATGTTGG     | geneticin <sup>1-664</sup> -<br>P <sub>gpdA</sub>      |
| Gene_F Bsal                   | ATAGGTCTCACGATGTCCTGGTAGCGATCC              |                                                        |
| Gene_F SapI (P3) <sup>2</sup> | TATGCTCTTCAACACGATGTCCTGGTAGCGATCC          | geneticin <sup>1-664</sup> -<br>P <sub>gpdA</sub> -RB  |
| FgRB_R SapI (P4) <sup>2</sup> | TATGCTCTTCATGACCAGAACCACCAATAACTG           |                                                        |
| TtrpC_F AgeI                  | ATATACCGGTGGTACCAGTTCAAGGAAGAAAC            | geneticin <sup>128-795</sup> -<br>T <sub>trpC</sub>    |
| Gene_R2 Bsal                  | TATGGTCTCACCGACCAGTCCTGTTCTGTTA             |                                                        |
| FgLB_F1                       | ATATGGTCTTAACAGTCTCCTTTAATCATGGAGCTGC       | LB from PH-1                                           |
| FgLB AgeI_R                   | ATATACCGGTTAGTATGGCCCAGCCCTC                |                                                        |
| FgLB_F XhoI (P1) <sup>2</sup> | ATATCTCGAGGTCTCCTTTAATC                     | LB-T <sub>trpC</sub> -<br>geneticin <sup>795-128</sup> |
| Gene_R XhoI (P2) <sup>2</sup> | ATATCTCGAGCCGACCAGTCC                       |                                                        |
| ProTri5_F1                    | ATATGGTCTCAACCTTCCTAGAATAAGACATGG           | <i>Tri5</i> promoter<br>fragment 1                     |
| ProTri5_R2                    | ATATGGTCTCATGTTGATGGCAAGGTTGACTGG           |                                                        |
| ProTri5_R1                    | ATATGGTCTCAGTCCTTGACGTATGGACGTGCTC          | <i>Tri5</i> promoter<br>fragment 2                     |
| ProTri5_F2                    | ATATGGTCTCAGGACTCTCTTACGACTGTCTGG           |                                                        |
| ProFgEffector1_F              | ATATGGTCTCAACCTTCGGCTATCATACCATCAGG         | <i>FgEffector1</i><br>promoter                         |
| ProFgEffector1_R              | ATATGGTCTCATGTTGATGAACGTTTGA AAAAGGTAGTC    |                                                        |
| PtprC_F                       | ATATGGTCTCAACCTAGTCGCTGCAGGAATTCG           | <i>trpC</i> promoter                                   |
| PtprC_R                       | ATATGGTCTCATGTTTTGGATGCTTGGGTAGAA           |                                                        |
| FgEffector1_F                 | ATATGGTCTCAGGCTGTATGTGCACCCAGGGACTCAAGTA    | <i>FgEffector1</i><br>gene                             |
| FgEffector1_R                 | ATATGGTCTCACTGATTTGCCAATGCCTGTTG            |                                                        |
| P5                            | TGCTACAGACAAAACCCGCT                        | LB genotyping                                          |
| P6 and P9 <sup>1</sup>        | GCGACCTACGAGACTGAGGAATCCGCTCTTGG            |                                                        |
| P10                           | AGATGGACTCCCGGACATCA                        | Combine with<br>P6 for RB<br>genotyping                |
| P11                           | GTTTCATCAAACCCGTTGCC                        | To test<br>insertion in TSI<br>locus 1                 |
| P12                           | TTTGGAGCCCGATGCAGACAT                       |                                                        |
| O1                            | CATGGCGGCCGCGGGAATTCGATTAGACCATTACGGGCCTG   | <i>osp24</i> promoter                                  |
| O2                            | GTTATCGAATAGACTGTGGTGTGGATTG                |                                                        |
| O3                            | ACCACAGTCTATTTCGATAACTGATATTGAAGGAGCATTTTTT | P <sub>trpC</sub> -HyG <sup>1-761</sup>                |
| O4                            | GCCGCGAATTCAGTGTGATGGATGCCTCCGCTCGAAG       |                                                        |
| O5                            | CATGGCGGCCGCGGGAATTCGATCGTTGCAAGACCTGCCTG   | Hyg <sup>296-1027</sup>                                |

|                    |                                                |                                   |
|--------------------|------------------------------------------------|-----------------------------------|
| O6                 | CTTGACTCCTCTCGAGGTCGACGGTATC                   |                                   |
| O7                 | CGACCTCGAGAGGAGTCAAGACTGGAATC                  | <i>osp24</i>                      |
| O8                 | GCCGCGAATTCAGTAGTGATCACAATAGGAAAGTAAATTGAGATAG | terminator                        |
| O9                 | TTGATCGGTTTCCTGGGAGC                           | To test <i>osp24</i>              |
| O10                | CACAGTTTCCTCGCGTGTTG                           | presence                          |
| O11                | CATGATATATCACATTCTCGGCGG                       | <i>LB genotyping</i>              |
| O12                | ACTTCTCGACAGACGTCCG                            | of PH-1-<br>$\Delta$ <i>osp24</i> |
| O13                | ACTCACCGCGACGTCTGT                             | <i>RB genotyping</i>              |
| O14                | CCAGTTAGTAGCCTGCCAC                            | of PH-1-<br>$\Delta$ <i>osp24</i> |
| O15                | TGGGTCTCGACCTTCTTACTCTGCAGAAATCAA              | <i>osp24</i> gene                 |
| O16                | TGGGTCTCGGTCCTAGTTCTCTCAATTTAGTC               | fragment 1                        |
| O17                | TGGGTCTCGGACTCGCAGGACTGGGATATA                 | <i>osp24</i> gene                 |
| O18                | TGGGTCTCGTAGTCACAATAGGAAAGTAAATTGAGAT          | fragment 2                        |
| FGRAMPH1_01T06815F | TGGTCGCATGATGTAACGGG                           | qPCR amplicon                     |
| FGRAMPH1_01T06815R | GTTGCCATGTTGGTTGTCTCA                          | size: 243 bp                      |
| FGRAMPH1_01T06817F | CCACATGAGGCTGGTCACTT                           | qPCR amplicon                     |
| FGRAMPH1_01T06817R | CAGGTCTGAAGCTGACTGGG                           | size: 162 bp                      |
| FGRAMPH1_01T14929F | TCAAGCGTATCTCTGCCATGAT                         | Histone. qPCR                     |
| FGRAMPH1_01T14929R | AAGCAGTCGACCGCAAAGA                            | amplicon size:<br>231 bp          |
| FGRAMPH1_01T24551F | CTCCCAGCGAAAGTACTCC                            | Actin. qPCR                       |
| FGRAMPH1_01T24551R | TTGTTCGGTCGGGTAGCTTAG                          | amplicon size:<br>150 bp          |
| GFP_F              | GGGCACAAGCTGGAGTACAA                           | qPCR amplicon                     |
| GFP_R              | CTCAGGTAGTGGTTGTTCGGG                          | size: 194 bp                      |

<sup>1</sup>P9 is the same primer as P6, because a primer that anneals to the *trpC* terminator was select.

<sup>2</sup>Primers in brackets were also used for validation of the transformants.
