# Supplementary material for: Identification and functional characterisation of a locus for target site integration in Fusarium graminearum
Source: Springer Nature journal article supplement (doi:10.1186/s40694-024-00171-8), 2024-02-26

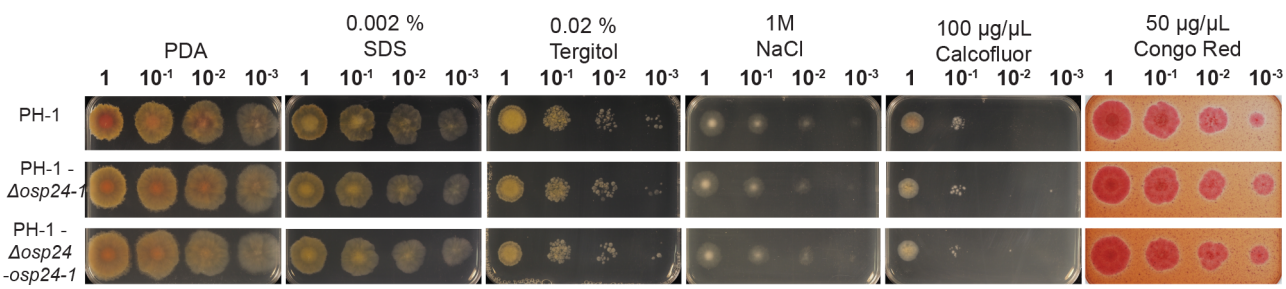

Supplement: MOESM5 [file 40694_2024_171_MOESM5_ESM.pdf]
